# Supplementary material for: Mammalian-wide interspersed repeat (MIR)-derived enhancers and the regulation of human gene expression
Source: PubMed Central journal article supplement (PMC4090950; doi:10.1186/1759-8753-5-14), 2014-05-05
Supplement: 1759-8753-5-14-S1.pdf [file 1759-8753-5-14-S1.pdf]

## MIRs Regulate Human Gene Expression and Function Predominantly via Enhancers

Daudi Jjingo, Jianrong Wang, Andrew B. Conley, Leonardo Mariño-Ramírez, Victoria V. Lunyak and I. King Jordan

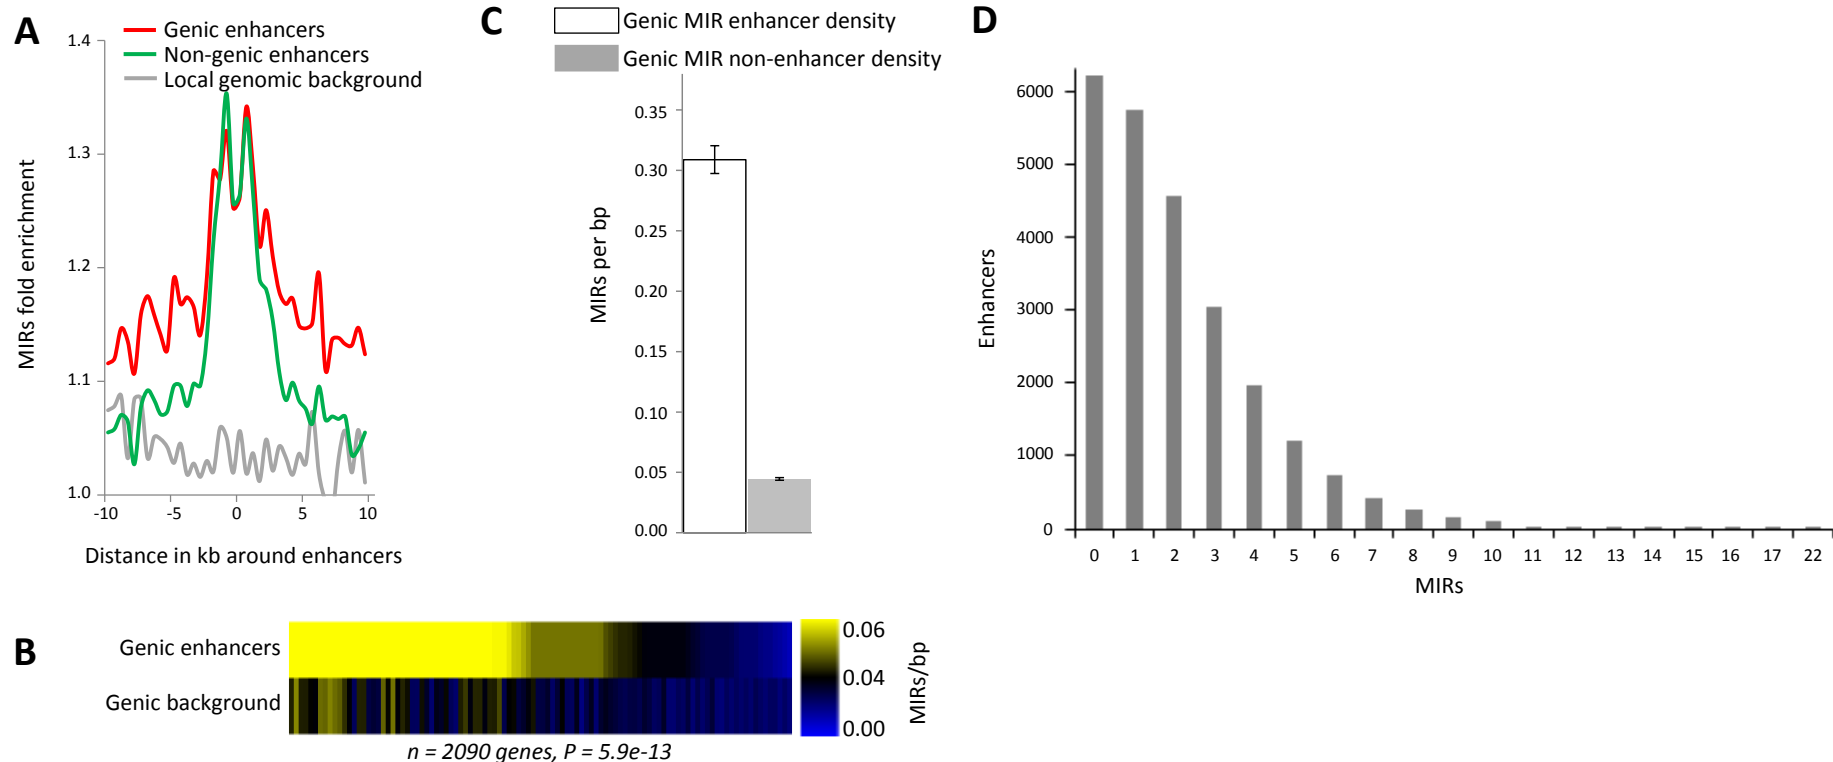

Figure S1. **MIRs are highly concentrated within enhancers.** (A) Fold enrichment of MIRs in-and-around all genic enhancers (red) and intergenic enhancers (green) relative to the local genomic background (grey) in HeLa cells. (B) Average MIR densities for genic enhancers compared to genic background in HeLa cells. (C) Average ( $\pm$ standard error) densities of MIRs in the core 200bp of genic enhancers (white bar) versus the corresponding non-enhancer sequences of the same genes (grey) in HeLa cells. (D) Distribution of MIRs within putative enhancers.

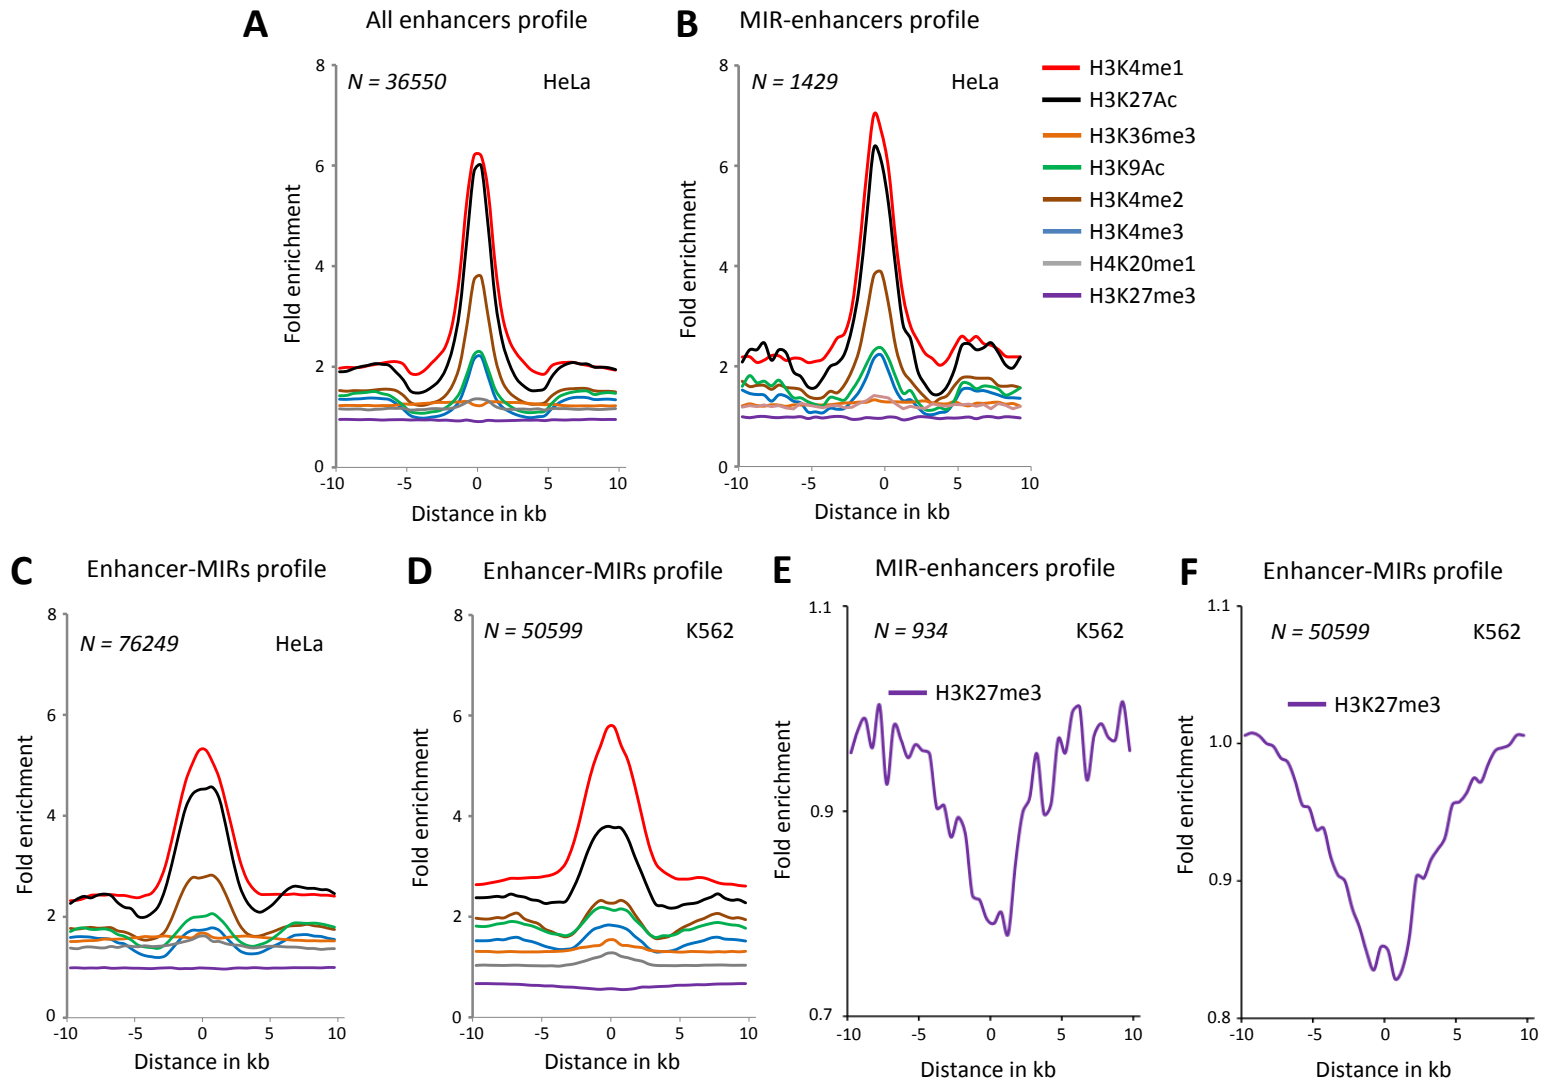

**Figure S2. The chromatin environment of MIR-enhancers and enhancer-MIRs is similar to that of canonical enhancers.** Fold enrichment of histone modifications centered on different categories of elements: (A) Canonical enhancers, (B) MIR-enhancers, (C) Enhancer-MIRs in HeLa cell-lines and (D) Enhancer-MIRs in K562 cell-lines. (E) Zoomed in version showing depletion of H3K27me3 around MIR-enhancers. (F) Zoomed in version showing depletion of H3K27me3 around enhancer-MIRs.

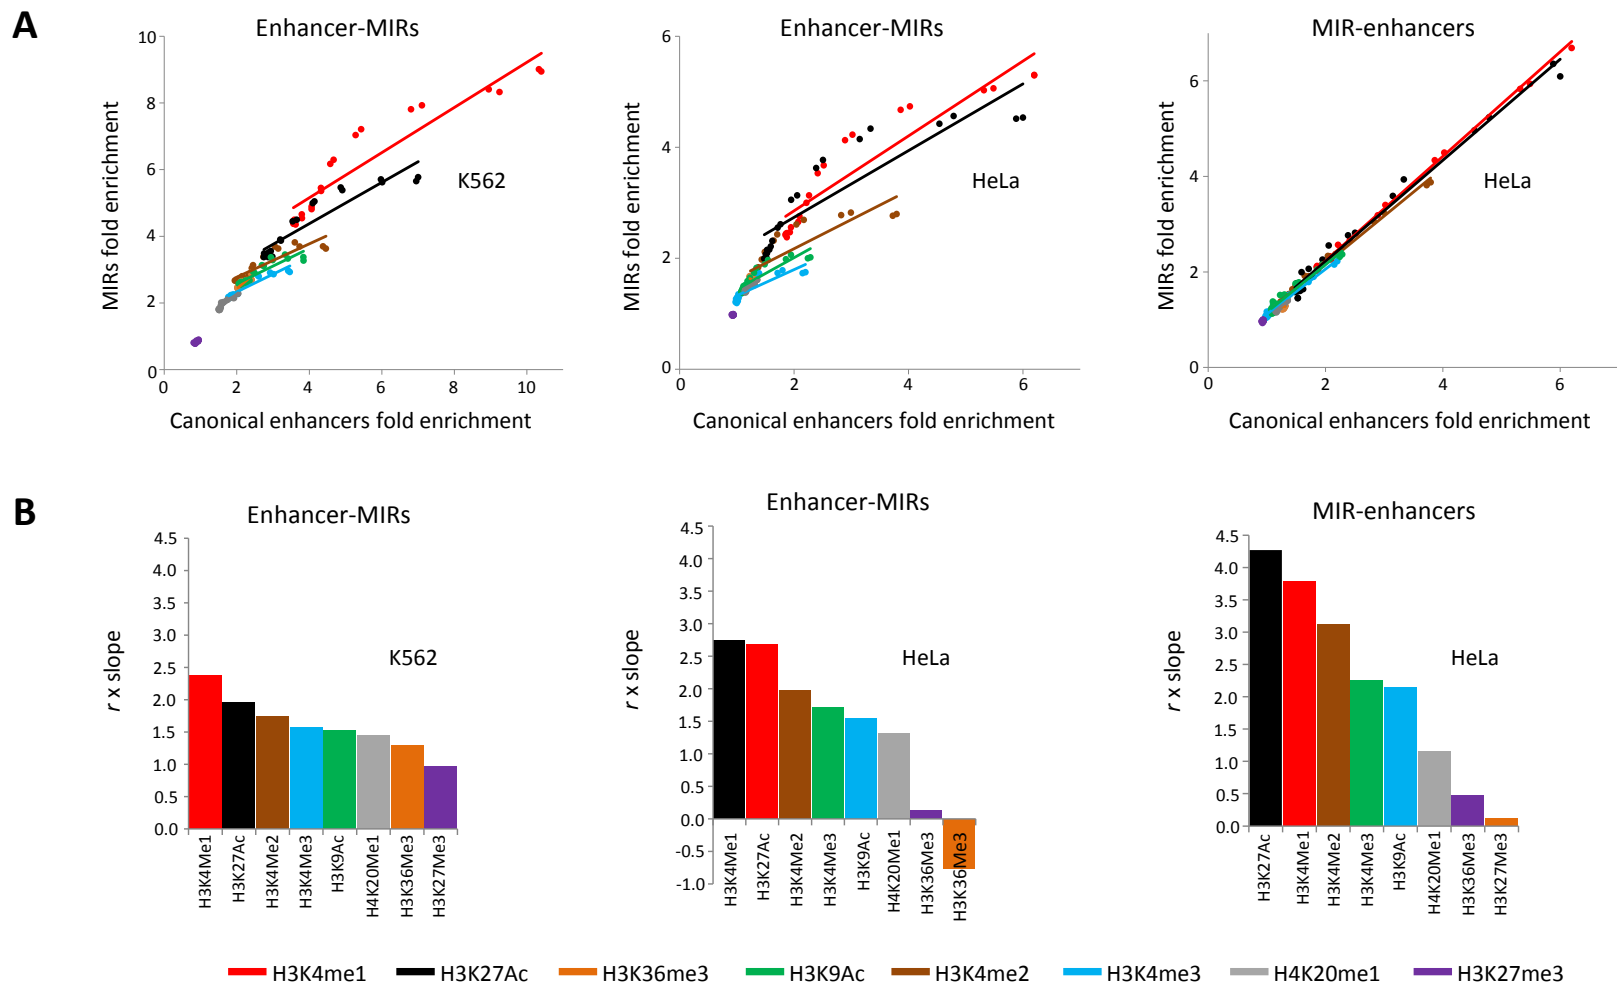

Figure S3. **Histone modifications patterns around enhancer-MIRs and MIR-enhancers are congruent to those around canonical enhancers.** (A) Congruence of histone modifications fold enrichment between MIR categories and canonical enhancers. Data points represent the histone modification fold enrichments for windows equally distant from the centers of the respective MIR categories in each plot. (B) Rank order of correlations of modifications fold enrichments between MIR categories and canonical enhancers weighted by slope.

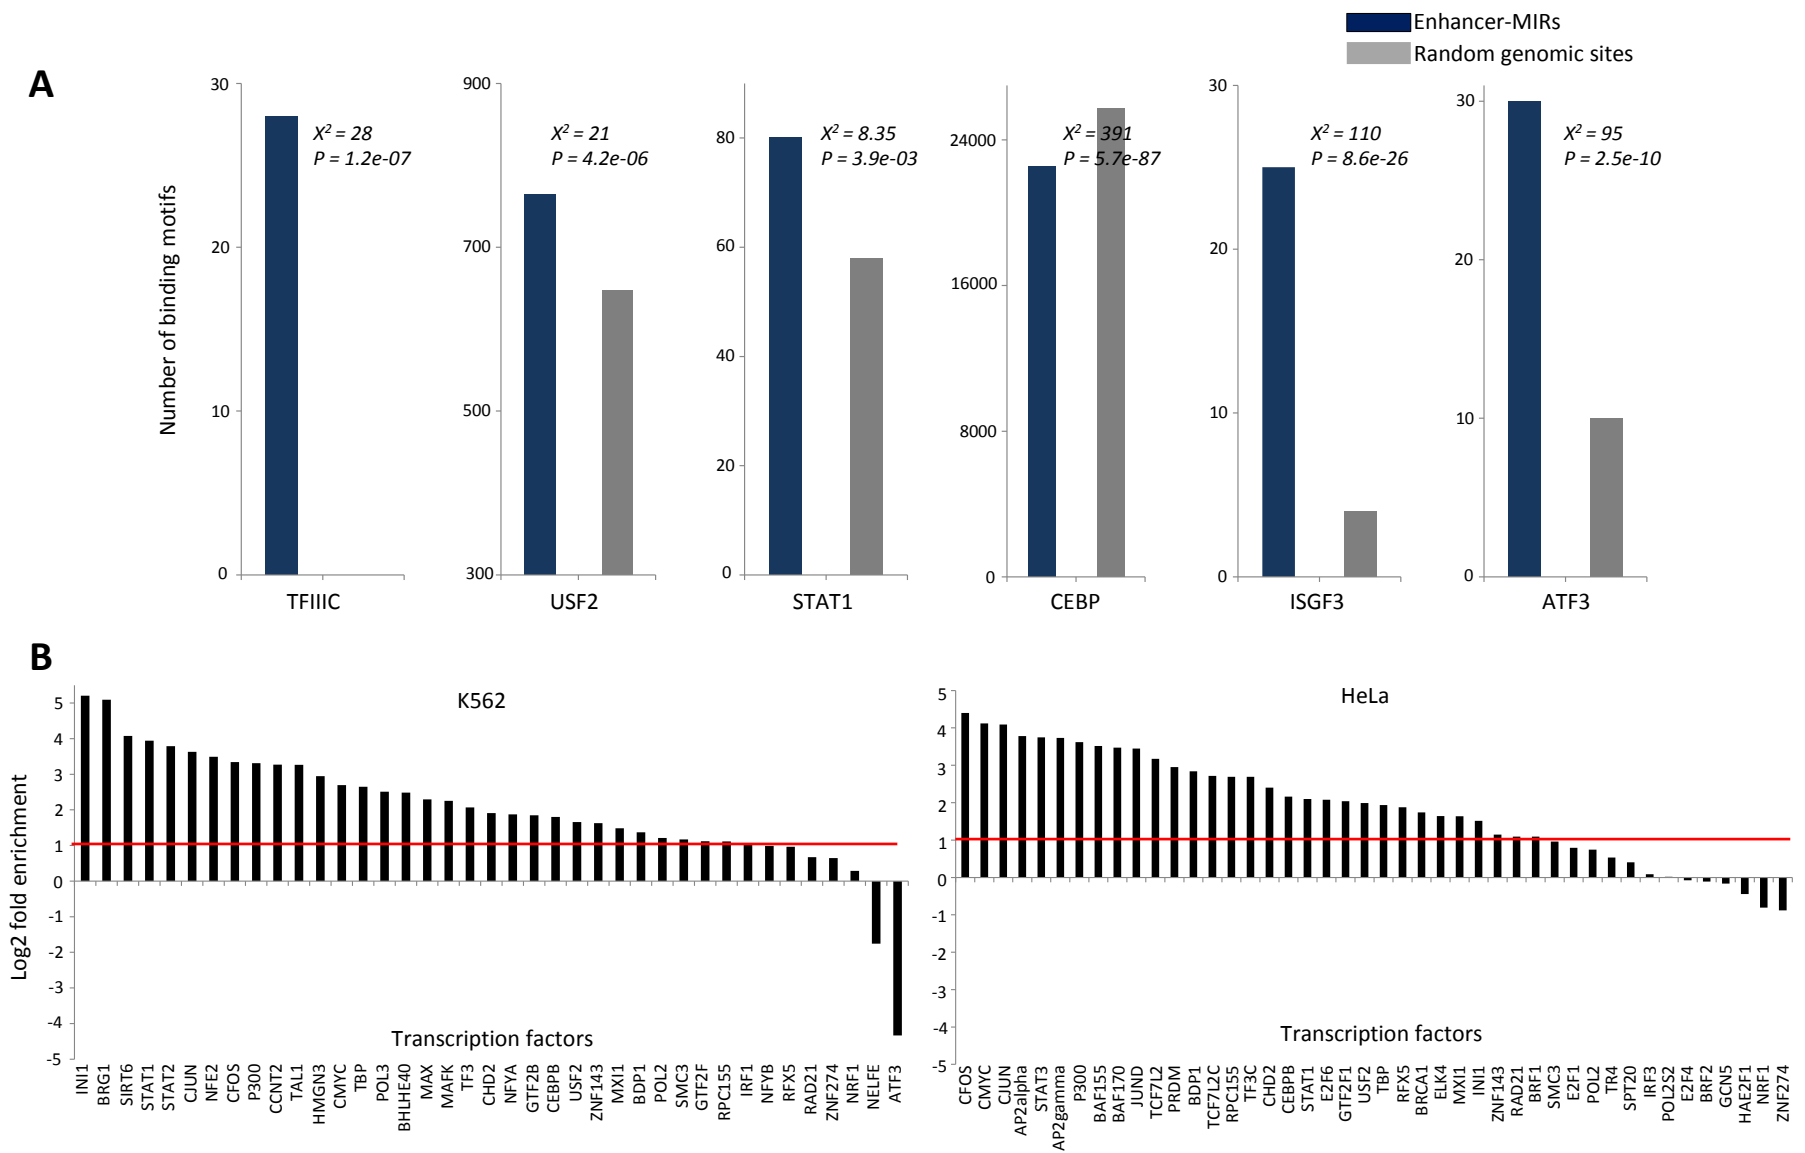

Figure S4. **TFBS presence and TF binding in enhancer-MIRs.** (A) Number of TFBS sequence motifs in enhancer-MIRs (blue) compared to random genomic sequences (grey) (significance levels computed using  $\chi^2$  test). (B) Enrichment levels for TF binding to enhancer-MIRs relative to non-enhancer MIRs in K562 and HeLa.

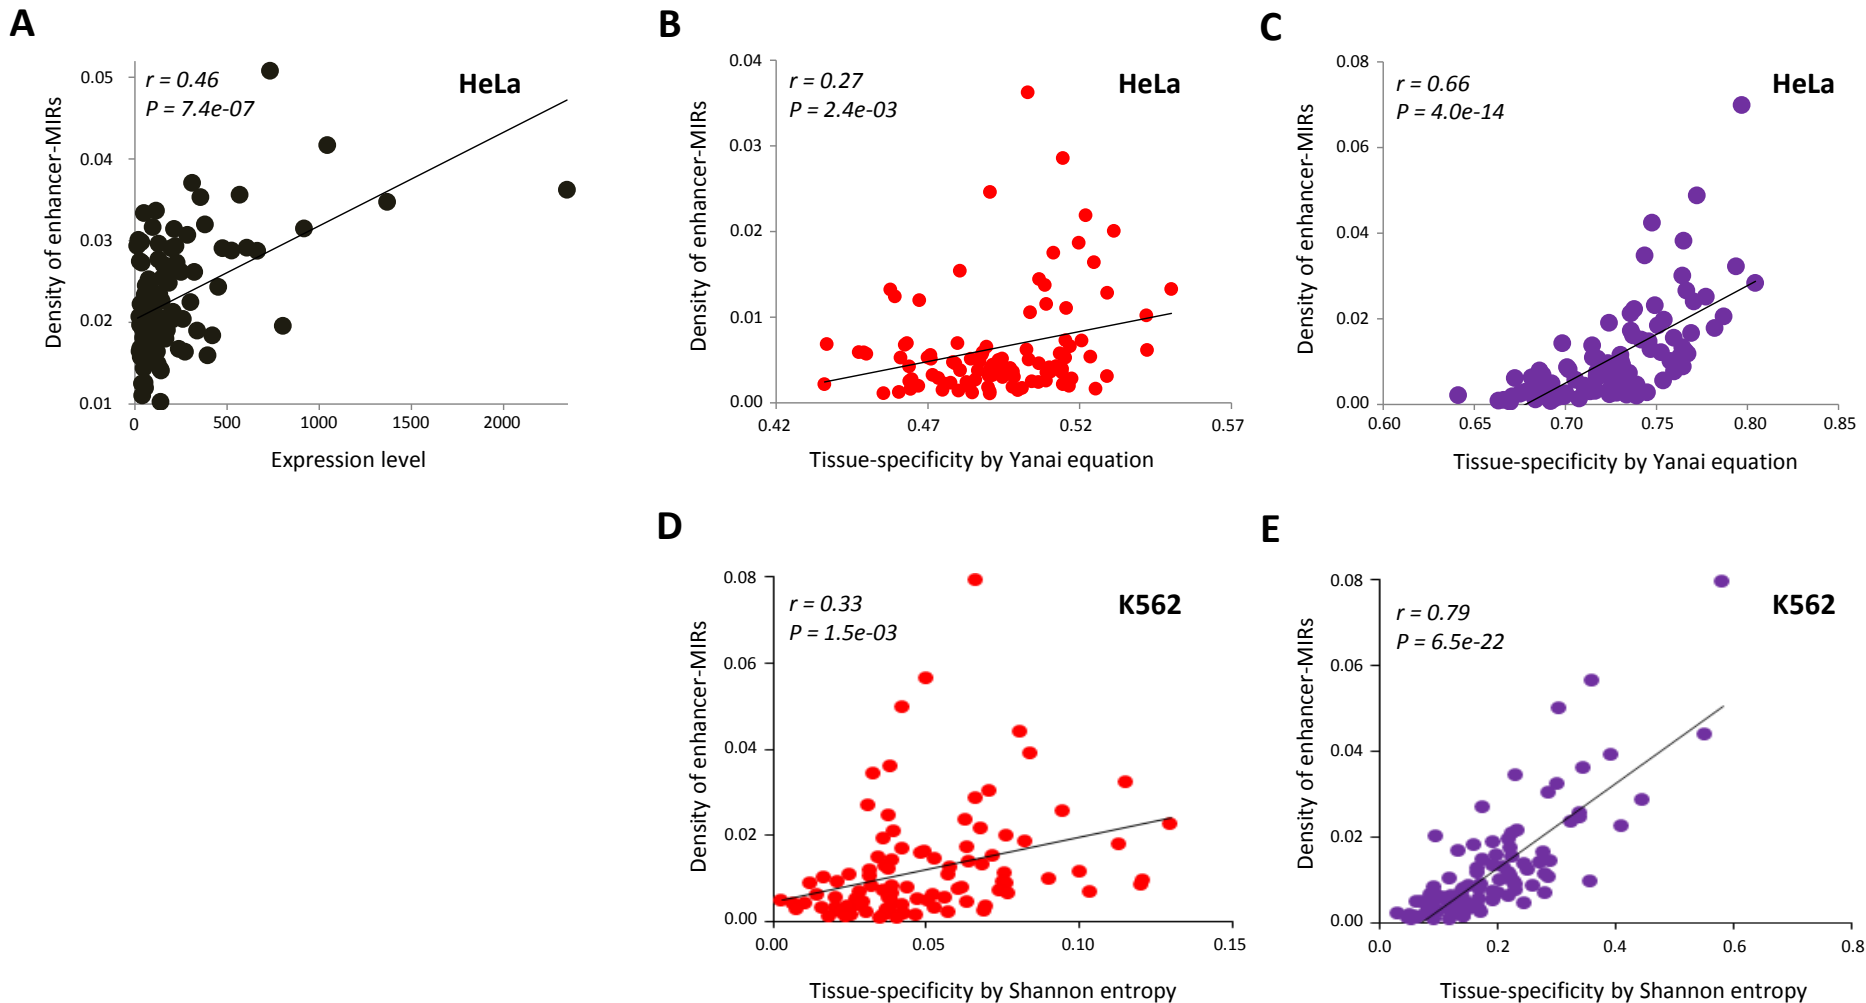

**Figure S5. Effect of enhancer-MIRs on gene expression parameters.** (A) Relationship between density of enhancer-MIRs and gene expression levels in HeLa. (B) Relationship between density of HeLa enhancer-MIRs in and tissue-specificity of gene expression across 6 ENCODE cell-lines. (C). Relationship between density of HeLa enhancer-MIRs and tissue-specificity of gene expression across 79 tissues from the Norvatis gene expression atlas. (D) Relationship between density of K562 enhancer-MIRs in and tissue-specificity of gene expression across 6 ENCODE cell-lines. (E). Relationship between density of K562 enhancer-MIRs and tissue-specificity of gene expression across 79 tissues from the Norvatis gene expression atlas. Pearson correlation coefficient values ( $r$ ) along with their significance values ( $P$ ) are shown for all pairwise regressions.

| Transcription Factors | Number of TF binding sites |                  | Z    | P-value   |
|-----------------------|----------------------------|------------------|------|-----------|
|                       | Enhancer-MIRs              | Random sequences |      |           |
| C-JUN                 | 26971                      | 22245            | 15.6 | 3.24E-54  |
| NF-E2                 | 56377                      | 51155            | 10.2 | 3.60E-142 |
| ZNF274                | 202571                     | 207541           | -4.2 | 1.35E-23  |

Table S1A. **Enrichment of TFBS (as counted by position weight matrices) in enhancer-MIRs relative to random genomic sites.** Number of TFBS sequence motifs in enhancer-associated MIRs compared to random genomic sequences (significance levels computed using Z-test).

| Transcription Factors | Density of TFBSs/bp |               |                      |                  |
|-----------------------|---------------------|---------------|----------------------|------------------|
|                       | Enhancer-MIRs       | MIR-enhancers | Non-MIR-TE-enhancers | Non-TE-enhancers |
| ZNF274                | 0.0267              | 0.0281        | 0.0282               | 0.0268           |
| C-JUN                 | 0.0036              | 0.0035        | 0.0034               | 0.0029           |
| NF-E2                 | 0.0074              | 0.0078        | 0.0072               | 0.0070           |

Table S1B. **Enrichment of TFBS in enhancer-MIRs relative to random genomic sites.** Number of TFBS sequence motifs in enhancer-associated MIRs compared to random genomic sequences (significance levels computed using Z-test).

| TE family | $-\log_{10}(P\text{-value})$<br>(Strength of TE vs Tissue-specificity) | GC content |
|-----------|------------------------------------------------------------------------|------------|
| MIR       | 21.2                                                                   | 40.8       |
| L2        | 12.9                                                                   | 41.9       |
| L1        | 10.4                                                                   | 34.1       |
| DNA       | 10.3                                                                   | 38.7       |
| LTR       | 9.2                                                                    | 43.4       |
| Alu       | 3.7                                                                    | 51.2       |

Table S1C. **Relatedness of TEs to tissue-specificity and their GC content.** Density of TE families in and around genes was correlated to the genes' tissue-specificity. *P*-value significances of correlations are then transformed using negative  $\log_{10}$ . TE-density x tissue-specificity correlations are not significantly correlated with GC-content of TE families ( $P=0.36$ ).

| <b>Biological process</b>                       | <b>Geneset size</b> | <b>Overlap with enhancer-MIR genes</b> | <b>Hypergeometric P-value</b> | <b><math>-\log_{10}</math> (P-value)</b> |
|-------------------------------------------------|---------------------|----------------------------------------|-------------------------------|------------------------------------------|
| Erythropoiesis (erythroid differentiation)      | 73                  | 44                                     | $2.0 \times 10^{-14}$         | 13.7                                     |
| Interphase of mitotic cell cycle                | 62                  | 32                                     | $1.1 \times 10^{-8}$          | 12.7                                     |
| Hemopoietic or lymphoid organ development       | 76                  | 43                                     | $6.5 \times 10^{-13}$         | 12.5                                     |
| Myeloid cell differentiation                    | 37                  | 22                                     | $8.0 \times 10^{-8}$          | 12.2                                     |
| Immune system development                       | 80                  | 46                                     | $4.7 \times 10^{-14}$         | 8.0                                      |
| Homeostasis of a number of cells                | 20                  | 12                                     | $6.5 \times 10^{-5}$          | 7.1                                      |
| Hemopoiesis                                     | 74                  | 43                                     | $1.9 \times 10^{-13}$         | 4.2                                      |
| Regulation of myeloid cell differentiation      | 19                  | 10                                     | $1.0 \times 10^{-3}$          | 3                                        |
| Negative regulation of myeloid cell development | 10                  | 4                                      | $8.2 \times 10^{-2}$          | 1.1                                      |

Table S2. **Enrichment of enhancer-MIR associated genes in several K562 related functions.** Enrichment statistics of enhancer-MIR associated genes in gene sets of biological functions linked to erythropoiesis. Enrichment was computed using the hypergeometric test of enrichment.

## Erythropoiesis genes

| Gene Symbols | Gene Descriptions                                                    |
|--------------|----------------------------------------------------------------------|
| CTSH         | Cathepsin H                                                          |
| INSIG1       | Insulin induced gene 1                                               |
| ITGB5        | Integrin, beta 5                                                     |
| NFYA         | Nuclear transcription factor Y, alpha                                |
| PTP4A3       | Protein tyrosine phosphatase type IVA, member 3                      |
| PTPN7        | Protein tyrosine phosphatase, non-receptor type 7                    |
| APOC1        | Apolipoprotein C-I                                                   |
| BIRC5        | Baculoviral IAP repeat-containing protein 5                          |
| GFI1B        | Growth factor independent 1B transcription repressor                 |
| ICAM3        | Intercellular adhesion molecule 3                                    |
| LMO2         | LIM domain only 2 (rhombotin-like 1)                                 |
| MT2A         | Metallothionein 2A                                                   |
| MYB          | MYB v-myb myeloblastosis viral oncogene homolog                      |
| SOCS2        | Suppressor of cytokine signaling 2                                   |
| ADAM10       | A disintegrin and metalloproteinase domain-containing protein 10     |
| DHX9         | DEAD/H box polypeptide 9                                             |
| GTF2I        | General transcription factor II, i                                   |
| SLC2A14      | Solute carrier family 2 (facilitated glucose transporter), member 14 |
| SLC43A3      | Solute carrier family 43, member 3                                   |
| GYPA         | Glycophorin A (MNS blood group)                                      |
| KLF1         | Kruppel-like factor 1 (erythroid)                                    |
| NCOA1        | Nuclear receptor coactivator 1                                       |
| NPL          | N-acetylneuraminase pyruvate lyase (dihydrodipicolinate synthase)    |
| SLC27A2      | Solute carrier family 27 (fatty acid transporter), member 2          |
| CREM         | cAMP responsive element modulator                                    |
| DDIT4        | DNA-damage-inducible transcript 4                                    |
| HSPA5        | Heat shock 70kDa protein 5 (glucose-regulated protein, 78kDa)        |
| IER3         | Immediate early response 3                                           |
| IER5         | Immediate early response 5                                           |
| AKR1C1       | Aldo-keto reductase family 1, member C1                              |
| ATF5         | Activating transcription factor 5                                    |
| HBA1         | Hemoglobin, alpha 1                                                  |
| IL8          | Interleukin 8                                                        |
| RTN4         | Reticulon 4                                                          |
| UCP2         | Uncoupling protein 2 (mitochondrial, proton carrier)                 |
| CTSL1        | Cathepsin L1                                                         |
| HSPA1B       | Heat shock 70kDa protein 1B                                          |
| PIM1         | Pim-1 oncogene                                                       |
| DNAJB4       | DnaJ (Hsp40) homolog, subfamily B, member 4                          |
| HBZ          | Hemoglobin, zeta                                                     |
| MAFG         | MAFG v-maf musculoaponeurotic fibrosarcoma oncogene homolog G        |
| OSGIN1       | Oxidative stress induced growth inhibitor 1                          |
| TXNRD1       | Thioredoxin reductase 1                                              |
| NPRL3        | Nitrogen permease regulator-like 3                                   |

Table S3. **Enhancer-MIR associated genes involved in erythropoiesis.** The genes are differentially expressed at the various stages of erythropoiesis. Genes with the same color are co-expressed and correspond to the color codes in Figure 6.
